# Supplementary material
Source: Springer Nature journal article supplement (https://www.springermedizin.de/resource/supplementary/12935_2012_345_MOESM12_ESM.pdf/9540332)

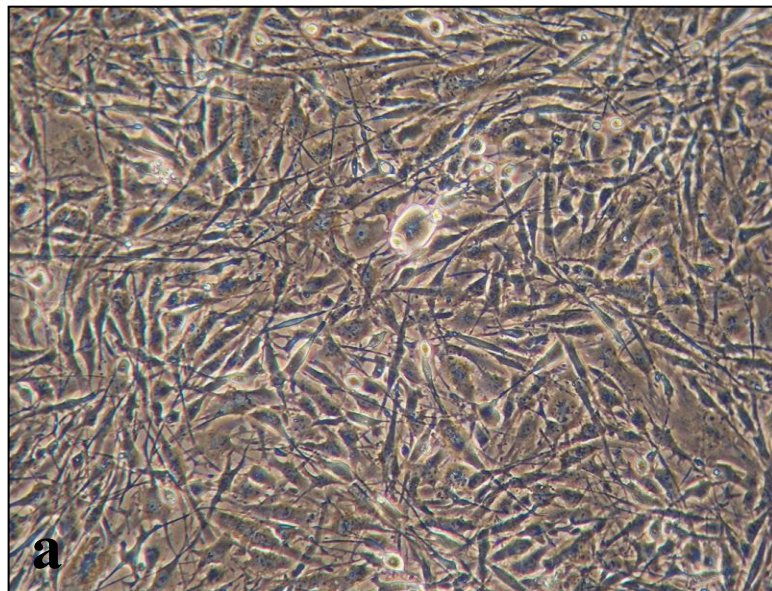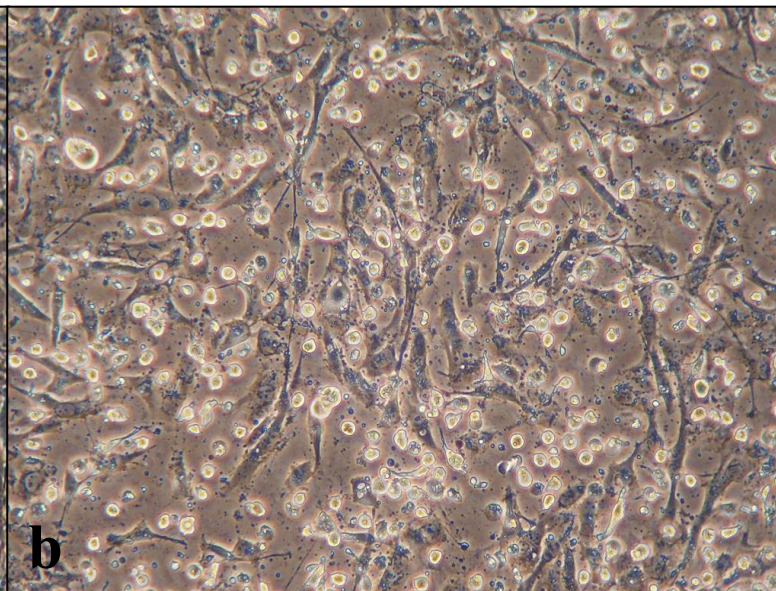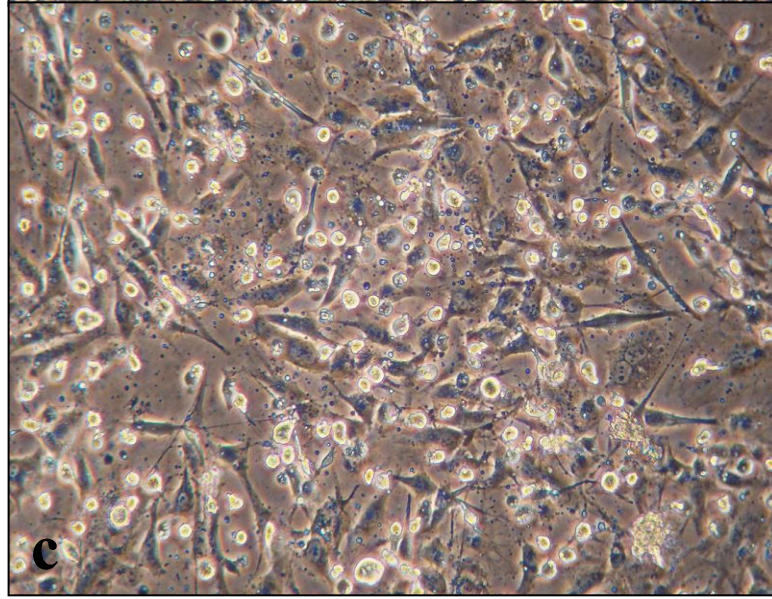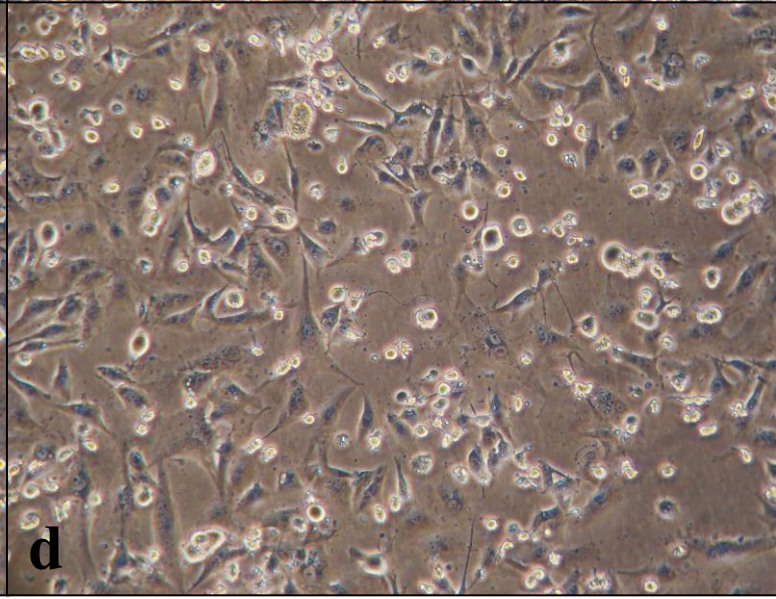

Supplement: MOESM12 [file 9540332]
